# Supplementary material for: Unveiling the Chemistry of Higher-Order Cycloaddition Reactions within the Molecular Electron Density Theory
Source: MDPI journal article supplement (doi:10.3390/chemistry4030052), 2022-07-26
Supplement: s1 [file s1]

## Supplementary Material

### Unveiling the Chemistry of Higher–Order Cycloaddition Reactions within Molecular Electron Density Theory

Luis R. Domingo,<sup>1\*</sup> Mar Ríos-Gutiérrez,<sup>1</sup> and Patricia Pérez<sup>2</sup>

<sup>1</sup> Department of Organic Chemistry, University of Valencia, Dr. Moliner 50, 46100 Burjassot, Valencia, Spain.

<sup>2</sup> Universidad Andres Bello, Facultad de Ciencias Exactas, Departamento de Ciencias Químicas, Centro de Química Teórica & Computacional. Av. República 275, 8370146, Chile.

E-mail: luisrdomingo@gmail.com

#### index

- S2** BET analysis of the most favourable reaction path associated with the higher–order cycloaddition reaction of tropone **1** with Cp **3**.
- S9** Figure with the gas-phase B3LYP/6-311G(d,p) geometries of the TSs involved in the higher-order cycloaddition reaction of tropone **1** with Cp **3**.
- S10** Figure with the  $\omega$ B97X-D/6-311G(d,p) geometries of **TS2o** and **IN2o**.
- S11** Figure with the IRC connecting tropone **1** and Cp **3** with the formal [4+2] cycloadduct **16**.
- S12** Table with the  $\omega$ B97X-D/6-311G(d,p) total electronic energies, in the gas phase and benzene, of the stationary points involved in the higher-order cycloaddition reaction of tropone **1** with Cp **3**.
- S13** Table with the B3LYP/6-311G(d,p) gas phase total and relative electronic energies of the stationary points involved in the higher-order cycloaddition reaction of tropone **1** with Cp **3**.
- S14**  $\omega$ B97X-D/6-311G(d,p) thermodynamic data of the stationary points involved in the higher-order cycloaddition reaction of tropone **1** with Cp **3**.
- S15**  $\omega$ B97X-D /6-311G(d,p) gas-phase computed total energies, unique imaginary frequency, and cartesian coordinates of the stationary points involved in the higher-order cycloaddition reaction of tropone **1** with Cp **3**.

*BET analysis of the most favorable reaction path associated with the higher-order cycloaddition reaction of tropone **1** with Cp **3**.*

To characterize the molecular mechanism of the higher-order cycloaddition reaction between tropone **1** with Cp **3**, the Bond Evolution Theory (BET) was applied along the most favourable [6+4] *exo* reaction path yielding the formal [6+4] CA **4** (See [Scheme S1](#)). This methodology comprehensively describes molecular mechanisms by topologically scanning the bonding changes along the corresponding reaction path. Complete BET analysis data are given in [Table S1](#), while [Table S2](#) gathers only the structures where significant chemical changes happen. [Figure S1](#) shows the ELF attractor positions and populations of the ELF valence basins involved in the C2–C9 and C7–C12 bond formation. The resulting molecular mechanism is represented in [Scheme S2](#) by Lewis-like structures.

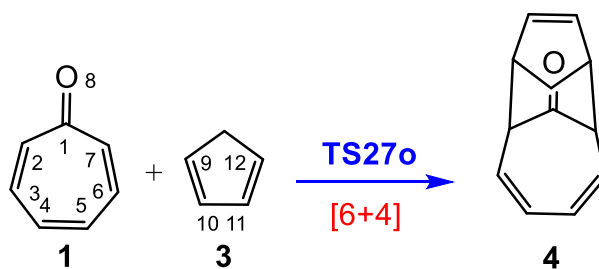

**Scheme S1**

The molecular mechanism of the cycloaddition reaction between tropone **1** and Cp **3** can be divided into three main groups of phases associated with a well-defined chemical event, namely: *Group A*, associated with the conjugation of the tropone multiple bond system; *Group B*, related to the formation of *pseudoradical* centers; and *Group C*, associated with the formation of the C2[7]–C9[12] single bonds. While *Group A* is independent of the others, *Group B* and *Group C* somewhat overlap each other due to the high asynchronicity of the bond formation (see later). Note that these groups are clearly defined in synchronous reactions such as the Diels-Alder reaction between butadiene and ethylene.

*Group A*, involving *Phases I–V*, begins at **S1** ( $d(\text{C2}–\text{C9}) = 3.266 \text{ \AA}$  and  $d(\text{C7}–\text{C12}) = 3.274 \text{ \AA}$ ), which is the first point of the IRC. This structure resembles the molecular complex of the reaction path and thus, presents similar topological features to those of the separated reagents. Therefore, at **S1**, the C–C multiple bond regions of the Cp and

tropone frameworks, which integrate by between 3.14 and 3.35 e, are characterized as partial double bonds, while the C10–C11, C2(7)–C1, and C3(5)–C4(6) are characterized as single bonds integrating 2.22, 2.32 and 2.37 e, respectively. Note that the tropone carbonyl C–O group does not participate throughout the reaction, as can be observed from the insignificant variation of the population of the V(C1,O8) disynaptic basin along the IRC (see Table S1). Along *Group A*, the partial double bonds of tropone are depopulated, and their population is redistributed into the adjacent C3–C4 and C5–C6 single bonds to generate a large favorable 6-carbon conjugated system at the end of *Group A*; the C1–C2 region also gathers a small amount of this electron density, reaching 2.47e at **S6**. Interestingly, a slight asymmetry in the bonding changes can already be observed at this early stage of the reaction despite the symmetry of the reagents; note that **S5** shows an earlier conjugation of C3–C4 than C5–C6 (see [Scheme S2](#)). At the Cp framework, there are no significant bonding changes yet. The conjugation of the tropone framework along *Group A* has a high energy cost of ca. 20.4 kcal·mol<sup>-1</sup>.

After the conjugation of the tropone system, the *pseudoradical* centers demanded for the C–C bond formation are created along *Group B*, which starts at **S6** ( $d(\text{C2}–\text{C9}) = 2.078 \text{ \AA}$  and  $d(\text{C7}–\text{C12}) = 2.631 \text{ \AA}$ ) and involves *Phases VI – XIII*. According to the electrophilic Parr functions, the first *pseudoradical* center is formed at the C2 carbon, which is the most electrophilic center of tropone **1** (see section 3.2). This C2 *pseudoradical* center gathers an initial population of 0.20 e due to the depopulation of the contiguous C1–C2 region. Similarly, a C9 *pseudoradical* center at the Cp framework is created at **S7**, with a population of 0.29 e, at the most nucleophilic C9 carbon from the depopulation of the neighboring C9–C10 partial double bond. Note that at **S7**, no *pseudoradical* center is formed yet at the equivalent C7 and C12 carbons, emphasizing the asymmetry of the bonding changes. The formation of these two *pseudoradical* centers has an energy cost of only 0.5 kcal·mol<sup>-1</sup>, confirming that this is a relatively easy chemical change. Indeed, the formation of *pseudoradical* centers and new bonds usually takes place after the corresponding TS, thus implying an energy release. As **TS27o** is found in *Phase VII*, its electronic structure is similar to **S7** (see ELF basin attractors of **T S27o** in [Figure 7](#)).

*Group C*, which begins at **S8** ( $d(\text{C2}–\text{C9}) = 1.933 \text{ \AA}$  and  $d(\text{C7}–\text{C12}) = 2.581 \text{ \AA}$ ) and involves *Phases VIII – XIV*, overlaps with *Group B* almost entirely except for *Phase XIV*. At **S8**, the first C2–C9 single bond is formed with an initial population of 0.95 e through

the C-to-C coupling of both C2 and C9 *pseudoradical* centers, which had reached 0.41 and 0.50 e, respectively (see [Scheme S2](#) and [Figure S1](#)). In addition, the continued depopulation of the C2–C3, C9–C10, and C11–C12 partial double bond regions since the beginning of the reaction while the electron population gathers at C10–C11, as well as the asymmetry of these changes, has led to an allylic conjugation of the electron density at the 5-membered ring. Both C2–C3 and C9–C10 regions can now be considered single bonds, and the conjugation at the tropone system involves five carbon atoms. Then, while the population of the recently formed C2–C9 single bond increases until the end of the reaction and the C4–C5 region keeps depopulating towards the two neighboring ones, the second pair of *pseudoradical* centers are formed in a similar way as the first one. At **S9**, C4–C5 can already be considered a single bond, and a new C7 *pseudoradical* center, integrating 0.20 e, is created from the depopulation of the C6–C7 region. At this point, the C6–C7 region reaches a maximum population of 2.59 e, contributing to the C7 *pseudoradical* center. Along *Phases IX* and *X*, the C6–C7 and C11–C12 regions keep depopulating to such an extent that they become single bonds, and a C12 *pseudoradical* center, integrating 0.21 e, is created at **S11** while the one at C7 has reached 0.39 e. Along *Phases XI – XIII*, there are only electron density adjustments with no relevant chemical meaning. The population of C7 and C12 *pseudoradical* centers increases to 0.60 and 0.43 e until they merge each other at **S14**, forming the new C7–C12 single bond when the first C2–C9 bond has already reached ca. 92% of its final population at a C2–C9 distance of 1.620 Å. From **S14** to the end of the reaction, the electron density rearrangements are mainly devoted to completing the C2–C9 and C7–C12 single bond formation by increasing their population.

**Table S1.** Most relevant ELF valence basins and their total populations, C–C bond formation distances, IRC values, and relative energies for the structures of the IRC of the higher-order cycloaddition reaction between tropone **1** with Cp **3**, yielding the formal [6+4] CA **4**. Distances are given in angstroms, Å, IRC values in au, and relative energies concerning **S1** are shown in kcal·mol<sup>-1</sup>.

[illegible]

**Table S2.** Most relevant ELF valence basins and their total populations, C–C bond formation distances, IRC values, and relative energies for the more relevant structures of the IRC of the higher-order cycloaddition reaction between tropone **1** with Cp **3**, associated with the formation of the C2–C9 and C7–C12 single bonds. Distances are given in angstroms, Å, IRC values in au, and relative energies with respect to **S1** are given in kcal·mol<sup>-1</sup>. V(Ci,Cj)<sub>t</sub> is the sum of the populations of the V(Ci,Cj) and V'(Ci,Cj) disynaptic basins.

[illegible]

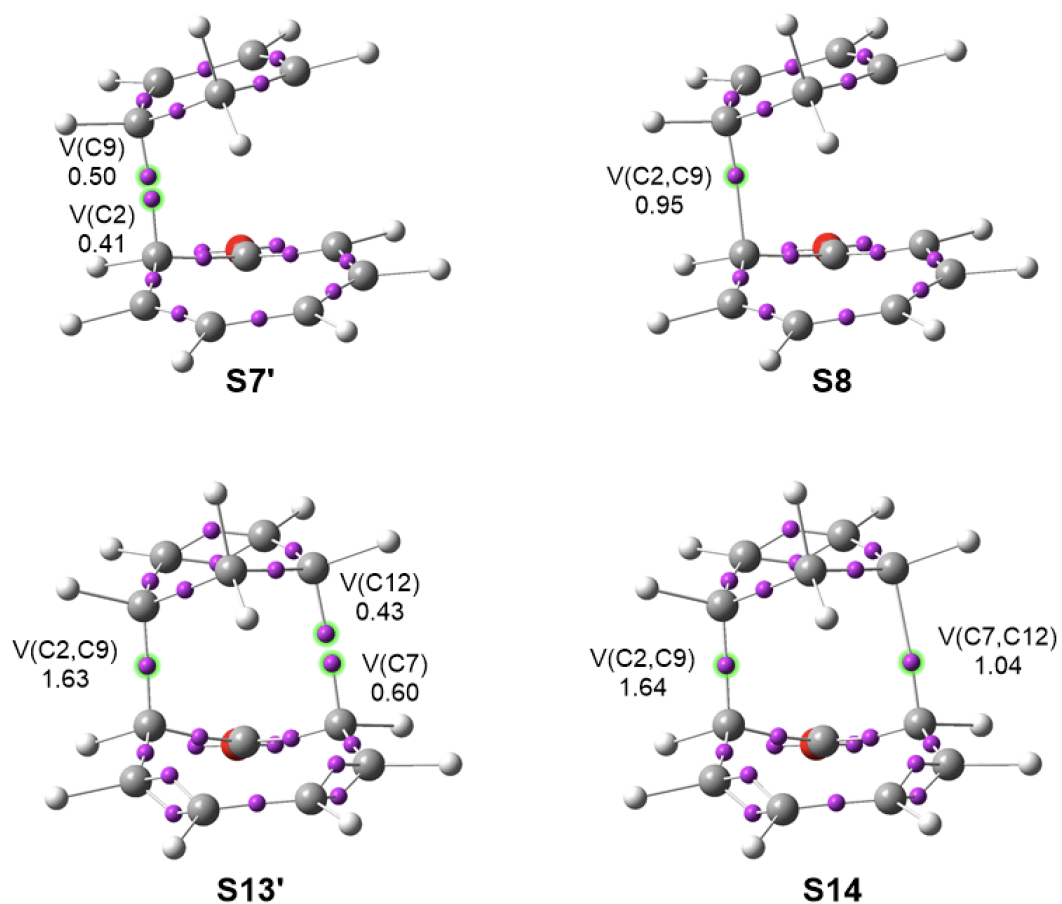

**Figure S1.** ELF attractor positions and populations of the ELF valence basins involved in the C2-C9 and C7-C12 bond formation at **S8** and **S14**, respectively, and the structures immediately before. Populations are given in an average number of electrons, e.

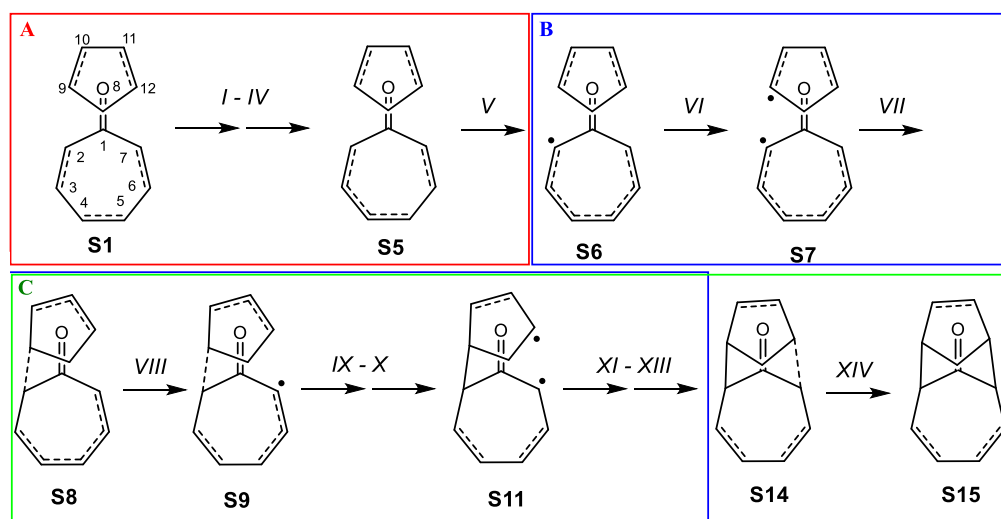

**Scheme S2.** Representation of the molecular mechanism of the cycloaddition reaction between tropone **1** and Cp **3** by Lewis-like structures based on the topological analysis of the ELF.



a) TSs associated with a two-center interaction process

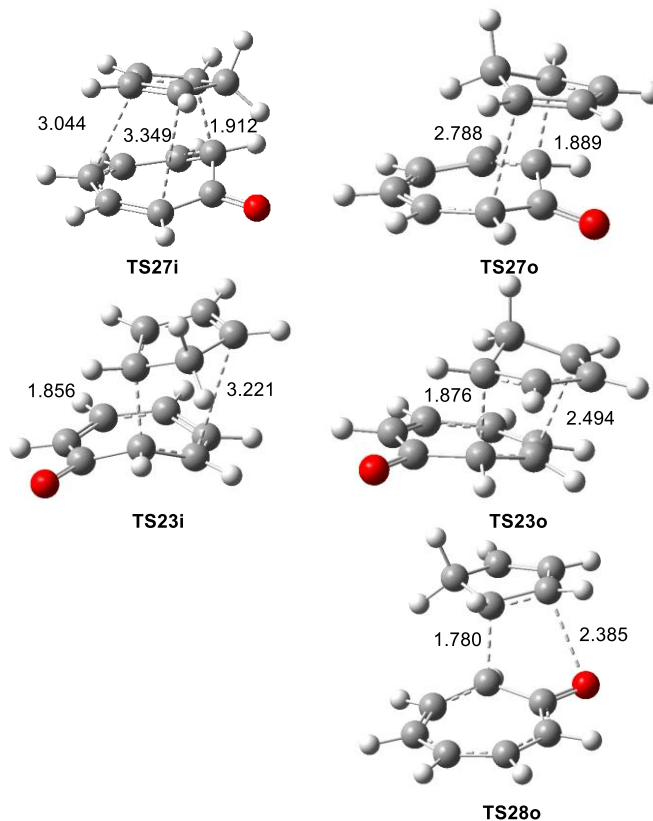

b) TSs associated with a four-center interaction process

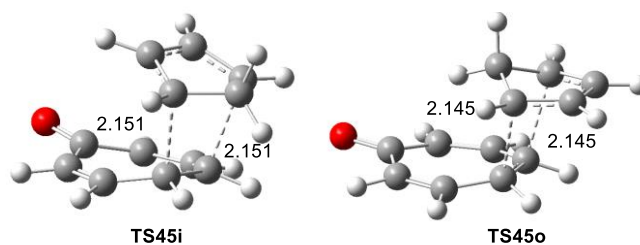

**Figure S2.** Gas-phase B3LYP/6-311G(d,p) geometries of the TSs involved in the higher-order cycloaddition reaction of tropone **1** with Cp **3**. Distances are given in Angstroms.

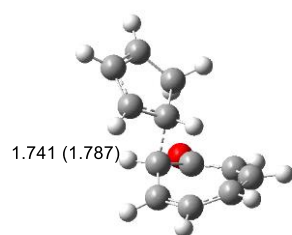**TS2o**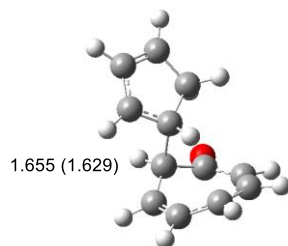**IN2o**

**Figure S3.**  $\omega$ B97X-D/6-311G(d,p) geometries of **TS2o** and **IN2o**. Distances are given in Angstroms. Distance in benzene are given in parenthesis.

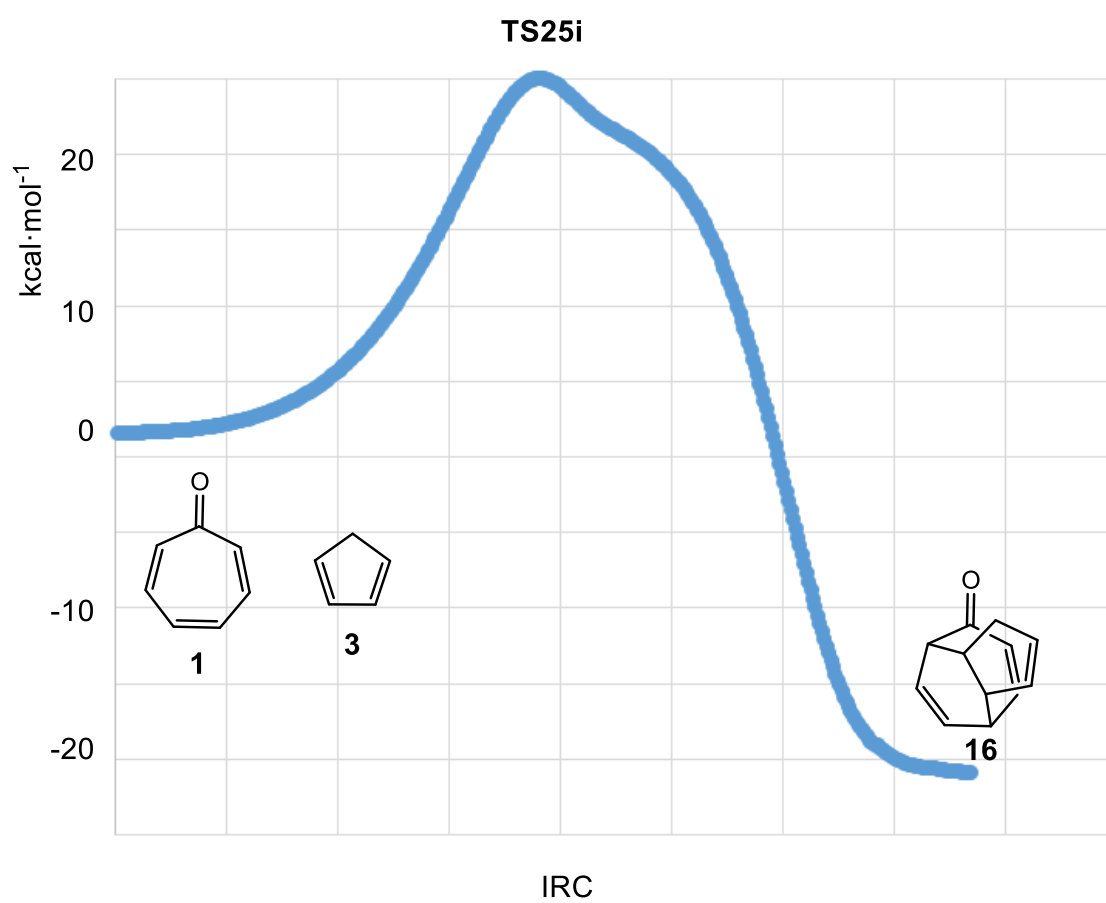

**Figure S4.** IRC connecting tropone **1** and Cp **3** with the formal [4+2] cycloadduct **16** via **TS25i**

**Table S3.**  $\omega$ B97X-D/6-311G(d,p) total electronic energies, in a.u., in the gas phase and benzene, of the stationary points involved in the higher-order cycloaddition reaction of tropone **1** with Cp **3**.

|              | gas phase   | benzene     |
|--------------|-------------|-------------|
| <b>1</b>     | -345.495830 | -345.499902 |
| <b>3</b>     | -194.081297 | -194.082370 |
| <b>TS25i</b> | -539.549972 | -539.554567 |
| <b>TS27o</b> | -539.553489 | -539.557822 |
| <b>TS23i</b> | -539.550492 | -539.555353 |
| <b>TS23o</b> | -539.549180 | -539.553419 |
| <b>TS28o</b> | -539.537087 | -539.541580 |
| <b>TS2o</b>  | -539.531437 | -539.537066 |
| <b>TS45i</b> | -539.546686 | -539.551652 |
| <b>TS45o</b> | -539.546326 | -539.551118 |
| <b>CA25i</b> | -539.623940 | -539.627415 |
| <b>CA27o</b> | -539.618242 | -539.621695 |
| <b>CA23i</b> | -539.603212 | -539.606665 |
| <b>CA23o</b> | -539.601904 | -539.605257 |
| <b>CA28o</b> | -539.611381 | -539.614038 |
| <b>IN2o</b>  | -539.531552 | -539.537847 |
| <b>CA45i</b> | -539.602599 | -539.606463 |
| <b>CA45o</b> | -539.600812 | -539.604541 |

**Table S4.** B3LYP/6-311G(d,p) gas phase total electronic energies, E in a.u., and relative energies,  $\Delta E$  in kcal mol<sup>-1</sup>, of the stationary points involved in the higher-order cycloaddition reaction of tropone **1** with Cp **3**.

|              | E           | $\Delta E$ |
|--------------|-------------|------------|
| <b>1</b>     | -345.626661 |            |
| <b>3</b>     | -194.153723 |            |
| <b>TS25i</b> | -539.742084 | 24.0       |
| <b>TS27o</b> | -539.746263 | 21.4       |
| <b>TS23i</b> | -539.741946 | 24.1       |
| <b>TS23o</b> | -539.740082 | 25.3       |
| <b>TS28o</b> | -539.737497 | 26.9       |
| <b>TS2o</b>  | -539.723099 | 35.9       |
| <b>TS45i</b> | -539.735564 | 28.1       |
| <b>TS45o</b> | -539.736059 | 27.8       |
| <b>CA25i</b> | -539.794566 | -8.9       |
| <b>CA27o</b> | -539.788537 | -5.1       |
| <b>CA23i</b> | -539.775824 | 2.9        |
| <b>CA23o</b> | -539.774943 | 3.4        |
| <b>CA28o</b> | -539.791101 | -6.7       |
| <b>IN2o</b>  | -539.784950 | -2.9       |
| <b>CA45i</b> | -539.775291 | 3.2        |
| <b>CA45o</b> | -539.774327 | 3.8        |

**Table S5.**  $\omega$ B97X-D/6-311G(d,p) total enthalpies, H in a.u., entropies, S in kcal·mol<sup>-1</sup>K<sup>-1</sup>, and Gibbs free energies, G in a.u., and relative enthalpies,  $\Delta$ H in kcal·mol<sup>-1</sup>, entropies,  $\Delta$ S in cal·mol<sup>-1</sup>K<sup>-1</sup>, and Gibbs free energies,  $\Delta$ G in kcal·mol<sup>-1</sup>, computed in benzene at 80 °C, of the stationary points involved in the higher-order cycloaddition reaction of tropone **1** with Cp **3**.

|              | H           | $\Delta$ H | S     | $\Delta$ S | G           | $\Delta$ G |
|--------------|-------------|------------|-------|------------|-------------|------------|
| <b>1</b>     | -345.379230 |            | 85.5  |            | -345.427326 |            |
| <b>3</b>     | -193.982599 |            | 69.9  |            | -194.021926 |            |
| <b>TS25i</b> | -539.333065 | 18.0       | 107.0 | -48.4      | -539.393270 | 35.1       |
| <b>TS27o</b> | -539.335962 | 16.2       | 105.0 | -50.4      | -539.395027 | 34.0       |
| <b>TS23i</b> | -539.333675 | 17.7       | 108.3 | -47.1      | -539.394602 | 34.3       |
| <b>TS23o</b> | -539.331192 | 19.2       | 107.1 | -48.2      | -539.391473 | 36.3       |
| <b>TS28o</b> | -539.319820 | 26.4       | 108.5 | -46.8      | -539.380881 | 42.9       |
| <b>TS45i</b> | -539.329679 | 20.2       | 109.8 | -45.5      | -539.391497 | 36.2       |
| <b>TS45o</b> | -539.333076 | 18.0       | 99.2  | -56.1      | -539.380215 | 43.3       |
| <b>CA25i</b> | -539.401588 | -24.9      | 103.3 | -52.1      | -539.459705 | -6.6       |
| <b>CA27o</b> | -539.395886 | -21.4      | 101.0 | -54.4      | -539.452705 | -2.2       |
| <b>CA23i</b> | -539.381002 | -12.0      | 104.1 | -51.2      | -539.439600 | 6.1        |
| <b>CA23o</b> | -539.379537 | -11.1      | 104.0 | -51.4      | -539.438038 | 7.0        |
| <b>CA28o</b> | -539.392797 | -19.4      | 96.6  | -58.7      | -539.438700 | 6.6        |
| <b>CA45i</b> | -539.384924 | -14.5      | 97.0  | -58.4      | -539.430999 | 11.5       |
| <b>CA45o</b> | -539.382853 | -13.2      | 96.6  | -58.7      | -539.428754 | 12.9       |

$\omega$ B97X-D /6-311G(d,p) gas phase computed total energies, unique imaginary frequency, and cartesian coordinates of the stationary points involved in the higher-order cycloaddition reaction of tropone **1** with Cp **3**.

**1**

E = -345.495829881 a.u.

|   |             |             |             |
|---|-------------|-------------|-------------|
| C | 1.84228500  | 0.67659800  | -0.00009900 |
| C | 1.84301900  | -0.67573800 | -0.00012100 |
| C | 0.71353100  | -1.56137500 | -0.00002100 |
| C | -0.60792600 | -1.28510100 | 0.00003000  |
| C | 0.71220100  | 1.56146600  | 0.00005900  |
| C | -0.60928300 | 1.28511100  | 0.00011900  |
| C | -1.32591300 | -0.00020800 | 0.00009100  |
| H | 2.81181900  | 1.16503700  | -0.00020700 |
| H | 2.81303700  | -1.16320300 | -0.00023700 |
| H | 0.97125900  | -2.61709800 | -0.00000500 |
| H | -1.29774800 | -2.12390500 | 0.00006200  |
| H | -1.29878000 | 2.12412000  | 0.00021000  |
| O | -2.54708600 | -0.00084500 | -0.00003600 |
| H | 0.96961300  | 2.61729600  | 0.00012600  |

**3**

E = -194.081297195 a.u.

|   |             |             |             |
|---|-------------|-------------|-------------|
| C | -0.00718900 | -1.21268500 | -0.00009600 |
| H | -0.01100600 | -1.87065900 | -0.87834700 |
| H | -0.01117800 | -1.86990700 | 0.87869600  |
| C | 1.17337800  | -0.28717600 | 0.00034800  |
| H | 2.20247100  | -0.61939800 | 0.00007800  |
| C | 0.73938100  | 0.98211000  | -0.00042700 |
| H | 1.35934600  | 1.86938700  | -0.00050800 |
| C | -1.17673000 | -0.27332800 | -0.00009400 |
| H | -2.20969400 | -0.59333600 | -0.00068600 |
| C | -0.72766300 | 0.99082400  | 0.00030500  |
| H | -1.33700100 | 1.88543700  | 0.00054800  |

**TS23i**

E = -539.550492 a.u.

1 imaginary frequency -376.8659 cm<sup>-1</sup>

|   |            |             |             |
|---|------------|-------------|-------------|
| C | 1.77081500 | -0.88920000 | 0.05806600  |
| C | 0.43266100 | -0.88472400 | 0.75164000  |
| C | 2.25825200 | 0.30624400  | -0.60343200 |

|   |             |             |             |
|---|-------------|-------------|-------------|
| C | -0.02682500 | 0.15697600  | 1.60206200  |
| C | 1.68330800  | 1.53390700  | -0.61124000 |
| C | 0.00734400  | 1.50438800  | 1.27943000  |
| C | 0.60192600  | 2.06057900  | 0.16154600  |
| H | -0.55459000 | -0.13366900 | 2.50346500  |
| H | -0.56634200 | 2.17518100  | 1.91227100  |
| H | 0.37803600  | 3.10601800  | -0.02912700 |
| H | 2.14947500  | 2.26456000  | -1.26920100 |
| H | 3.15138800  | 0.14194800  | -1.19665200 |
| H | 0.30444300  | -1.87909300 | 1.17397200  |
| O | 2.38411800  | -1.94418300 | 0.01175600  |
| C | -2.06880200 | -1.40855900 | 0.03293400  |
| H | -1.94855100 | -1.92858700 | 0.98336900  |
| H | -2.64978500 | -2.06688300 | -0.62788800 |
| C | -2.75255100 | -0.08490700 | 0.12302900  |
| H | -3.61868900 | 0.11064300  | 0.74070500  |
| C | -2.19367500 | 0.77304400  | -0.76840200 |
| H | -2.54054700 | 1.77461000  | -0.98513100 |
| C | -0.77359100 | -1.05444300 | -0.69325000 |
| H | -0.23746900 | -1.83188300 | -1.22919300 |
| C | -1.02302100 | 0.18920500  | -1.32302000 |
| H | -0.43534600 | 0.60556100  | -2.12680500 |

**TS23o**

E = -539.549180 a.u.

1 imaginary frequency -537.1475 cm-1

|   |             |             |             |
|---|-------------|-------------|-------------|
| C | 1.22805300  | 1.31578500  | -0.26592700 |
| C | 0.02342600  | 0.65161500  | -0.84876500 |
| C | -1.27302600 | 1.03280300  | 0.65660800  |
| C | 2.26575900  | 0.58330700  | 0.46849400  |
| C | -0.14925600 | -0.72726200 | -1.14166300 |
| C | 2.48920300  | -0.74400800 | 0.58034700  |
| C | 0.68039800  | -1.83590400 | -0.76764900 |
| C | 1.78755000  | -1.86175900 | 0.01200600  |
| H | -0.81435500 | -0.94140500 | -1.96851700 |
| H | 0.35005100  | -2.79287400 | -1.16396900 |
| H | 2.23492500  | -2.83300200 | 0.19611300  |
| H | 3.36710000  | -1.01813600 | 1.16070400  |
| H | 2.98026600  | 1.25886800  | 0.92812300  |
| H | -0.41798500 | 1.33039700  | -1.56833200 |
| O | 1.33093100  | 2.52737500  | -0.38171100 |
| C | -1.08814400 | -0.29253100 | 1.34944700  |
| H | -1.63846000 | -0.25288900 | 2.30051400  |
| H | -0.06372900 | -0.58917900 | 1.56396500  |
| C | -1.84399700 | -1.17979500 | 0.41148800  |
| H | -1.87073900 | -2.25826100 | 0.49564900  |
| C | -2.82275000 | -0.39993200 | -0.20153700 |



|   |             |             |             |
|---|-------------|-------------|-------------|
| H | -3.63492200 | -0.77897300 | -0.80823400 |
| H | -0.89691300 | 1.96507200  | 1.06007800  |
| C | -2.50151400 | 0.94316200  | -0.02916400 |
| H | -3.01691500 | 1.77848700  | -0.48451700 |

**TS25i**

E = -539.549972 a.u.

1 imaginary frequency -436.3229 cm<sup>-1</sup>

|   |             |             |             |
|---|-------------|-------------|-------------|
| C | 0.12938900  | 1.49131600  | 0.39579500  |
| C | 0.44021400  | 0.98703200  | -0.98200600 |
| C | 0.49480100  | 0.70838500  | 1.55765500  |
| C | 1.69752300  | 0.43782000  | -1.34892600 |
| C | 1.23404500  | -0.43698500 | 1.59540100  |
| C | 2.34815800  | -0.55924900 | -0.66342600 |
| C | 1.97866700  | -1.07727300 | 0.57910900  |
| H | 2.07498800  | 0.70260900  | -2.33173800 |
| H | 3.18547100  | -1.04102000 | -1.16062700 |
| H | 2.49312300  | -1.98257800 | 0.88850900  |
| H | 1.27874000  | -0.93131300 | 2.56321300  |
| H | 0.08482200  | 1.09489800  | 2.48445300  |
| H | 0.05280100  | 1.71490700  | -1.69179500 |
| O | -0.49682300 | 2.54048300  | 0.49705200  |
| C | -2.18192400 | 0.16399900  | -0.68282200 |
| H | -3.01810200 | -0.08145100 | -1.35079000 |
| H | -2.19561400 | 1.24504000  | -0.52769200 |
| C | -2.30372000 | -0.62854200 | 0.57384200  |
| H | -3.00073100 | -0.39610700 | 1.36740100  |
| C | -1.45139600 | -1.68191000 | 0.53897600  |
| H | -1.36465300 | -2.44931300 | 1.29663500  |
| C | -0.90925400 | -0.39431900 | -1.30872300 |
| H | -0.79056900 | -0.36037500 | -2.38532000 |
| C | -0.62428800 | -1.59103800 | -0.61750000 |
| H | 0.06100900  | -2.35458400 | -0.95291400 |

**TS27o**

E = -539.553489 a.u.

1 imaginary frequency -493.3301 cm<sup>-1</sup>

|   |             |             |             |
|---|-------------|-------------|-------------|
| C | -0.07181900 | -0.25478900 | 1.28403900  |
| C | 0.23033500  | 1.11818900  | 0.80250200  |
| C | 0.45998200  | -1.41931200 | 0.60534700  |
| C | 1.50075100  | 1.54309200  | 0.31715500  |
| C | 1.64100000  | -1.54824400 | -0.12305400 |
| C | 2.49437400  | 0.80579400  | -0.27967700 |
| C | 2.54662400  | -0.57822100 | -0.51501600 |

|   |             |             |             |
|---|-------------|-------------|-------------|
| H | 1.68205300  | 2.61242900  | 0.38711900  |
| H | 3.36113900  | 1.36830400  | -0.61577900 |
| H | 3.42231100  | -0.93303300 | -1.04974100 |
| H | 1.88723700  | -2.56420000 | -0.42083000 |
| H | -0.02515900 | -2.33386600 | 0.92895300  |
| H | -0.24947900 | 1.83933800  | 1.45729700  |
| O | -0.92921400 | -0.37818100 | 2.15226800  |
| C | -0.64431000 | 0.24910400  | -1.67690700 |
| H | 0.43374500  | 0.15127900  | -1.80125800 |
| H | -1.05587400 | 0.53728400  | -2.65467800 |
| C | -1.34697800 | -0.98590300 | -1.21282300 |
| H | -1.19814000 | -1.96377500 | -1.64801100 |
| C | -2.38794300 | -0.61825400 | -0.38865100 |
| H | -3.12672000 | -1.28708300 | 0.03012100  |
| C | -1.10209700 | 1.27170800  | -0.65581900 |
| H | -0.99005600 | 2.33165200  | -0.85005400 |
| C | -2.28074700 | 0.74707100  | -0.08398600 |
| H | -2.94238100 | 1.28570800  | 0.58005600  |

**TS28o**

E = -539.537087 a.u.

1 imaginary frequency -417.2890 cm<sup>-1</sup>

|   |             |             |             |
|---|-------------|-------------|-------------|
| C | -0.58629500 | 1.11949000  | 0.43400200  |
| C | -0.09657900 | -0.29184800 | 0.58166400  |
| C | -1.86125400 | 1.47679600  | -0.05413500 |
| C | -0.95601300 | -1.43791300 | 0.67329200  |
| C | -2.93893000 | 0.68380300  | -0.42717300 |
| C | -2.22971800 | -1.62505200 | 0.19540100  |
| C | -3.11223600 | -0.68968100 | -0.35801500 |
| H | -0.50140600 | -2.31009100 | 1.13700400  |
| H | -2.62312200 | -2.63376400 | 0.29660400  |
| H | -4.06539800 | -1.07402700 | -0.70616900 |
| H | -3.78656200 | 1.23553600  | -0.82646700 |
| H | -1.98004300 | 2.55083000  | -0.15961400 |
| H | 0.66721500  | -0.29643300 | 1.36520600  |
| O | 0.28423200  | 1.98031700  | 0.67088600  |
| C | 2.10301000  | -1.46163600 | -0.36337100 |
| H | 2.49993500  | -1.96173500 | -1.25586000 |
| H | 1.71253600  | -2.24309600 | 0.29124100  |
| C | 3.18147700  | -0.63723800 | 0.26835900  |
| H | 3.99330700  | -1.05427300 | 0.85031100  |
| C | 2.99887900  | 0.66983300  | -0.01368200 |
| H | 3.64453700  | 1.48536500  | 0.28023800  |
| C | 1.08300200  | -0.40943100 | -0.79611700 |
| H | 0.44144600  | -0.62289300 | -1.64463600 |
| C | 1.78400600  | 0.82909900  | -0.75775100 |
| H | 1.50760800  | 1.72471500  | -1.28980000 |

**TS45i**

E = -539.546686 a.u.

1 imaginary frequency -562.4246 cm<sup>-1</sup>

|   |             |             |             |
|---|-------------|-------------|-------------|
| C | -0.50465900 | 0.79016700  | -1.20286400 |
| C | -0.51080000 | -0.62295300 | -1.30937800 |
| C | -1.93883900 | -1.15389500 | 0.31692000  |
| C | -1.82829800 | 1.13864200  | 0.43505100  |
| C | 2.24992300  | -0.03252200 | 0.25891400  |
| C | 1.77818800  | 1.28396700  | -0.21257100 |
| C | 1.72762900  | -1.28199000 | -0.32177600 |
| C | 0.64221700  | 1.61035100  | -0.84652900 |
| C | 0.59332500  | -1.50707400 | -1.00717500 |
| H | 0.51713200  | 2.66365200  | -1.08842700 |
| H | -1.18544100 | 1.29382000  | -1.88133800 |
| H | -1.20529700 | -1.02874900 | -2.03662100 |
| H | 0.43876100  | -2.52992600 | -1.34406300 |
| H | 2.38932100  | -2.12253200 | -0.13625500 |
| H | 2.47883500  | 2.07738900  | 0.02892900  |
| O | 3.16246900  | -0.08322900 | 1.06823300  |
| C | -2.75711200 | 0.05377100  | -0.04248300 |
| H | -3.07929200 | 0.12216100  | -1.08094100 |
| H | -3.65278500 | 0.06526500  | 0.59436400  |
| H | -2.23891000 | -2.16774300 | 0.08365600  |
| C | -1.14835600 | -0.79772200 | 1.41000600  |
| H | -0.56248400 | -1.48165500 | 2.00834500  |
| H | -2.06302600 | 2.19290400  | 0.35028300  |
| C | -1.08501500 | 0.59125200  | 1.48820000  |
| H | -0.44579500 | 1.14928300  | 2.15831200  |

**TS45o**

E = -539.546326 a.u.

1 imaginary frequency -581.3128 cm<sup>-1</sup>

|   |             |             |             |
|---|-------------|-------------|-------------|
| C | -0.40795300 | 0.70980400  | -1.10991300 |
| C | -0.40793700 | -0.70951200 | -1.11015600 |
| C | -1.67412700 | 1.14674600  | 0.60223300  |
| C | -1.67440900 | -1.14689100 | 0.60217400  |
| C | 2.46347400  | -0.00007200 | 0.25553800  |
| C | 1.88895400  | 1.28758400  | -0.17400700 |
| C | 1.88882100  | -1.28761500 | -0.17412700 |
| C | 0.71410400  | 1.56357200  | -0.76712500 |
| C | 0.71398300  | -1.56341200 | -0.76738200 |
| H | 0.54611100  | 2.61142600  | -1.00703400 |
| H | -1.08548200 | 1.16851600  | -1.81830700 |

|   |             |             |             |
|---|-------------|-------------|-------------|
| H | -1.08555200 | -1.16804800 | -1.81858000 |
| H | 0.54592100  | -2.61122000 | -1.00744100 |
| H | 2.56056300  | -2.11497700 | 0.03272900  |
| H | 2.56080800  | 2.11484700  | 0.03288300  |
| O | 3.48594100  | -0.00014600 | 0.92362700  |
| C | -1.07189400 | -0.00018000 | 1.35744700  |
| H | 0.01258000  | -0.00034200 | 1.44950400  |
| H | -1.49251000 | -0.00012700 | 2.37294700  |
| H | -1.45707500 | 2.18212100  | 0.83302100  |
| C | -2.90095200 | 0.69508700  | 0.09376700  |
| H | -3.66055800 | 1.32408600  | -0.35197800 |
| H | -1.45740000 | -2.18234100 | 0.83264000  |
| C | -2.90108500 | -0.69494900 | 0.09367300  |
| H | -3.66081400 | -1.32375100 | -0.35213900 |

**TS2o**

E = -539.531437 a.u.

1 imaginary frequency -115.1251 cm<sup>-1</sup>

|   |             |             |             |
|---|-------------|-------------|-------------|
| C | -0.81636000 | 1.28940800  | 0.59982800  |
| C | -0.19303700 | -0.04436500 | 0.99338800  |
| C | 0.86388500  | -0.38814900 | -0.34725600 |
| C | 1.81853400  | -1.35275600 | 0.06453400  |
| C | -1.75772900 | 1.33077300  | -0.48142700 |
| C | -1.06690100 | -1.17170900 | 1.24105200  |
| C | -2.30217100 | 0.27877700  | -1.18082300 |
| C | -1.94593200 | -1.68849000 | 0.32308400  |
| C | -2.33757000 | -1.09486500 | -0.88403400 |
| H | -0.89112300 | -1.73736400 | 2.15039400  |
| H | -2.36782300 | -2.66658200 | 0.54076400  |
| H | -2.89693900 | -1.71636900 | -1.57557800 |
| H | -2.85681700 | 0.56051800  | -2.07356700 |
| H | -1.99935400 | 2.33824900  | -0.80338500 |
| H | 0.47340600  | 0.16419400  | 1.82861400  |
| O | -0.38858900 | 2.29945700  | 1.15179200  |
| C | 1.68755100  | 0.82436400  | -0.77348600 |
| H | 1.45636800  | 1.70949800  | -0.16165600 |
| H | 1.48386500  | 1.12176100  | -1.80848800 |
| C | 3.09300200  | 0.40920200  | -0.54980700 |
| H | 3.94387900  | 1.06100100  | -0.70064800 |
| C | 3.13906200  | -0.85653800 | -0.05110800 |
| H | 4.03191100  | -1.39303900 | 0.24053400  |
| H | 0.08450700  | -0.72983700 | -1.04493000 |
| H | 1.55283000  | -2.32160800 | 0.46993800  |

**CA23i**

E = -539.60321184 a.u.

|   |             |             |             |
|---|-------------|-------------|-------------|
| C | -1.21100000 | -1.24611600 | -0.28010300 |
| C | 0.14849300  | -0.77563100 | -0.76801700 |
| C | -2.14001100 | -0.42465100 | 0.52110400  |
| C | 0.54612400  | 0.70694000  | -1.04693800 |
| C | -2.26368100 | 0.90798800  | 0.56394700  |
| C | -0.38181300 | 1.85604600  | -0.82765500 |
| C | -1.51992200 | 1.94812900  | -0.13496900 |
| H | 0.86036000  | 0.76468000  | -2.09465900 |
| H | -0.01948100 | 2.77974200  | -1.27626200 |
| H | -1.97438400 | 2.93322300  | -0.07892000 |
| H | -3.08000300 | 1.28651400  | 1.17443500  |
| H | -2.85980200 | -1.03131300 | 1.06148800  |
| H | 0.30874500  | -1.35680800 | -1.67865300 |
| O | -1.50834800 | -2.40516200 | -0.49347400 |
| C | 2.47449700  | -0.51521900 | -0.32198600 |
| H | 2.68809300  | -0.79165600 | -1.35841100 |
| H | 3.36749100  | -0.64233900 | 0.29216400  |
| C | 1.85039800  | 0.87923300  | -0.17100100 |
| H | 2.45409600  | 1.73820500  | -0.46270100 |
| C | 1.40141900  | 0.82666900  | 1.27562600  |
| H | 1.28830200  | 1.68541500  | 1.92326400  |
| C | 1.25015100  | -1.23381500 | 0.26455800  |
| H | 1.29277600  | -2.31595100 | 0.37090200  |
| C | 1.03998600  | -0.43019100 | 1.53238400  |
| H | 0.57275900  | -0.80470900 | 2.43344800  |

**CA23o**

E = -539.6019042 a.u.

|   |             |             |             |
|---|-------------|-------------|-------------|
| C | 1.18865800  | 1.30188700  | -0.28235000 |
| C | -0.17475800 | 0.71034900  | -0.60176800 |
| C | 2.20506800  | 0.61973900  | 0.55088600  |
| C | -0.42107600 | -0.80918900 | -0.86331700 |
| C | 2.48675500  | -0.68783900 | 0.59194100  |
| C | 0.67478000  | -1.82240800 | -0.75169800 |
| C | 1.85081200  | -1.79159700 | -0.11826000 |
| H | -0.83975100 | -0.91972300 | -1.86663400 |
| H | 0.41440500  | -2.76848600 | -1.22277200 |
| H | 2.43078800  | -2.70999900 | -0.12719100 |
| H | 3.34747500  | -0.97693900 | 1.18979800  |
| H | 2.85288400  | 1.31429200  | 1.07587300  |
| H | -0.50709600 | 1.29079200  | -1.46218400 |
| O | 1.41507800  | 2.43886900  | -0.64241200 |
| C | -1.07524100 | -0.31769900 | 1.38663200  |
| H | -1.77288300 | -0.34911500 | 2.22511700  |
| H | -0.07059500 | -0.57561300 | 1.72742700  |
| C | -1.55344600 | -1.15478300 | 0.19021600  |

|   |             |             |             |
|---|-------------|-------------|-------------|
| H | -1.68482500 | -2.22475600 | 0.34678900  |
| C | -2.78374700 | -0.37690500 | -0.22563800 |
| H | -3.64073700 | -0.79848900 | -0.73505400 |
| C | -1.14980500 | 1.00583600  | 0.61069100  |
| H | -0.91282800 | 1.92565700  | 1.14262300  |
| C | -2.54427800 | 0.90956100  | 0.02652100  |
| H | -3.15979500 | 1.75971200  | -0.23764200 |

**CA27o**

E = -539.6182421 a.u.

|   |             |             |             |
|---|-------------|-------------|-------------|
| C | 0.06173700  | 0.00152500  | 1.22836000  |
| C | 0.02150400  | 1.29157000  | 0.41806500  |
| C | 0.02138800  | -1.29054700 | 0.42129600  |
| C | 1.38397600  | 1.59985500  | -0.14226900 |
| C | 1.38343700  | -1.60038200 | -0.13917800 |
| C | 2.34310000  | 0.73382400  | -0.49434600 |
| C | 2.34267700  | -0.73538000 | -0.49340900 |
| H | 1.59849800  | 2.65705600  | -0.27137400 |
| H | 3.26367800  | 1.16944000  | -0.87246200 |
| H | 3.26260500  | -1.17201100 | -0.87194600 |
| H | 1.59704400  | -2.65788900 | -0.26735100 |
| H | -0.25223300 | -2.07926500 | 1.12638800  |
| H | -0.25225900 | 2.08204000  | 1.12114600  |
| O | 0.13293000  | 0.00299600  | 2.42965700  |
| C | -0.75804500 | -0.00199400 | -1.61198300 |
| H | 0.26511000  | -0.00260600 | -1.98524700 |
| H | -1.44270200 | -0.00302900 | -2.46346900 |
| C | -1.08717000 | -1.17833000 | -0.68380100 |
| H | -1.19411600 | -2.13460600 | -1.19910000 |
| C | -2.35769300 | -0.66635000 | -0.02859600 |
| H | -3.08912200 | -1.30135500 | 0.45609800  |
| C | -1.08690600 | 1.17674800  | -0.68681500 |
| H | -1.19367700 | 2.13171800  | -1.20457300 |
| C | -2.35757700 | 0.66670100  | -0.03034600 |
| H | -3.08883900 | 1.30310100  | 0.45277300  |

**CA28o**

E = -539.6113812 a.u.

|   |             |             |             |
|---|-------------|-------------|-------------|
| C | -0.42640900 | -0.86564200 | 0.26109100  |
| C | -0.18976000 | 0.59495500  | -0.02140600 |
| C | -1.50358300 | -1.56861000 | -0.13311100 |
| C | -1.27777300 | 1.39439700  | 0.64379800  |
| C | -2.66211900 | -0.97355900 | -0.74590300 |
| C | -2.56862400 | 1.28789900  | 0.29614600  |

|   |             |             |             |
|---|-------------|-------------|-------------|
| C | -3.12558000 | 0.29236400  | -0.59237100 |
| H | -0.98535300 | 2.09629600  | 1.42015700  |
| H | -3.27653800 | 1.97920300  | 0.74661800  |
| H | -4.07105900 | 0.53785900  | -1.06674400 |
| H | -3.27454700 | -1.64910700 | -1.33767000 |
| H | -1.48385500 | -2.64450300 | -0.00098900 |
| H | -0.23990000 | 0.74943200  | -1.10705600 |
| O | 0.60694600  | -1.42392900 | 0.92275800  |
| C | 2.20774100  | 1.42218800  | -0.53892000 |
| H | 2.94338600  | 2.09328700  | -0.08171400 |
| H | 1.69725100  | 1.99858100  | -1.31597100 |
| C | 2.88722900  | 0.18847900  | -1.07551200 |
| H | 3.52277000  | 0.20671000  | -1.95337000 |
| C | 2.64454500  | -0.88666600 | -0.33525100 |
| H | 3.04155500  | -1.88017700 | -0.50130000 |
| C | 1.23245200  | 0.85798700  | 0.51243200  |
| H | 1.18964300  | 1.48041300  | 1.40738900  |
| C | 1.75062500  | -0.56395900 | 0.83217200  |
| H | 2.26862200  | -0.65556200 | 1.78960100  |

**CA45i**

E = -539.6025994 a.u.

|   |             |             |             |
|---|-------------|-------------|-------------|
| C | -0.66754500 | 0.78047500  | -0.95966700 |
| C | -0.66749500 | -0.78043300 | -0.95968100 |
| C | -1.75931300 | -1.11965700 | 0.13175000  |
| C | -1.75939100 | 1.11963000  | 0.13174900  |
| C | 2.34245700  | -0.00000600 | 0.14882800  |
| C | 1.76537700  | 1.30268700  | -0.25502900 |
| C | 1.76540800  | -1.30272700 | -0.25494800 |
| C | 0.55973300  | 1.59913100  | -0.73696400 |
| C | 0.55979600  | -1.59910600 | -0.73700000 |
| H | 0.38925200  | 2.65290900  | -0.95640400 |
| H | -1.07827400 | 1.10813500  | -1.92091000 |
| H | -1.07821900 | -1.10811200 | -1.92092000 |
| H | 0.38925200  | -2.65286500 | -0.95647400 |
| H | 2.47278000  | -2.11235400 | -0.10252500 |
| H | 2.47278400  | 2.11229800  | -0.10267200 |
| O | 3.38321500  | 0.00004300  | 0.77963300  |
| C | -2.77422500 | -0.00007800 | -0.14024700 |
| H | -3.16221200 | -0.00007400 | -1.16313900 |
| H | -3.59998100 | -0.00008900 | 0.57257200  |
| H | -2.11542300 | -2.14794000 | 0.07863900  |
| C | -1.19259900 | -0.66638800 | 1.46092400  |
| H | -0.75869700 | -1.31897300 | 2.20625600  |
| H | -2.11561300 | 2.14787000  | 0.07858900  |
| C | -1.19263700 | 0.66643900  | 1.46090100  |
| H | -0.75875700 | 1.31904700  | 2.20622900  |

**CA45o**

E = -539.6008116 a.u.

|   |             |             |             |
|---|-------------|-------------|-------------|
| C | 0.55241700  | -0.78064100 | -0.75878600 |
| C | 0.55241700  | 0.78064200  | -0.75878600 |
| C | 1.56941600  | -1.11839800 | 0.40707200  |
| C | 1.56941600  | 1.11839800  | 0.40707300  |
| C | -2.56109800 | 0.00000000  | 0.13595700  |
| C | -1.92795300 | -1.30134800 | -0.17007500 |
| C | -1.92795300 | 1.30134800  | -0.17007500 |
| C | -0.68775300 | -1.59155500 | -0.56116000 |
| C | -0.68775400 | 1.59155600  | -0.56115900 |
| H | -0.49396000 | -2.65078400 | -0.72862000 |
| H | 0.98773800  | -1.12749600 | -1.70012600 |
| H | 0.98773800  | 1.12749700  | -1.70012500 |
| H | -0.49396000 | 2.65078500  | -0.72862000 |
| H | -2.62869800 | 2.12050900  | -0.04012100 |
| H | -2.62869700 | -2.12051000 | -0.04012100 |
| O | -3.68036000 | 0.00000000  | 0.61446900  |
| C | 1.22403900  | 0.00000000  | 1.40132700  |
| H | 0.17598900  | 0.00000000  | 1.71197100  |
| H | 1.87204500  | 0.00000000  | 2.27886000  |
| H | 1.49657400  | -2.14568300 | 0.76171400  |
| C | 2.93365900  | -0.66609400 | -0.06968600 |
| H | 3.70822900  | -1.32417000 | -0.44218800 |
| H | 1.49657500  | 2.14568300  | 0.76171500  |
| C | 2.93366000  | 0.66609300  | -0.06968600 |
| H | 3.70822900  | 1.32417000  | -0.44218800 |

**IN2o**

E = -539.531552086 a.u.

|   |             |             |             |
|---|-------------|-------------|-------------|
| C | -0.86499700 | 1.30038000  | 0.58604200  |
| C | -0.21220200 | -0.01679900 | 1.01494000  |
| C | 0.83356500  | -0.36443100 | -0.21941400 |
| C | 1.82695900  | -1.30225000 | 0.20021900  |
| C | -1.73069900 | 1.29341800  | -0.55609500 |
| C | -1.10612700 | -1.14636700 | 1.27245500  |
| C | -2.17280000 | 0.20413600  | -1.27585600 |
| C | -1.89650800 | -1.71171200 | 0.31474400  |
| C | -2.17413200 | -1.16282400 | -0.95400900 |
| H | -1.02928200 | -1.63237800 | 2.23930900  |
| H | -2.34775100 | -2.67525600 | 0.53825200  |
| H | -2.64325600 | -1.82067600 | -1.67859000 |
| H | -2.65737000 | 0.44467700  | -2.22020900 |



|   |             |             |             |
|---|-------------|-------------|-------------|
| H | -1.99213600 | 2.28438500  | -0.91183100 |
| H | 0.39567100  | 0.22746600  | 1.88573900  |
| O | -0.50240000 | 2.32671400  | 1.15321600  |
| C | 1.63313800  | 0.83800800  | -0.72528700 |
| H | 1.47087700  | 1.71066900  | -0.07075500 |
| H | 1.33121700  | 1.17071700  | -1.72457500 |
| C | 3.04497300  | 0.40626300  | -0.63323100 |
| H | 3.88542200  | 1.02860900  | -0.91343800 |
| C | 3.12896700  | -0.83443400 | -0.07048500 |
| H | 4.04249800  | -1.36500400 | 0.16196900  |
| H | 0.11232900  | -0.77402000 | -0.95718900 |
| H | 1.59016000  | -2.23323000 | 0.70144200  |
